# Supplementary material for: Management Strategies in Transitional Economies : Doing Business in Kazakhstan
Source: Royal Society of Chemistry journal article supplement (doi:10.1039/c3dt51899j), 2012-01-01
Supplement: c3dt51899j.pdf [file c3dt51899j.pdf]

Electric Supplemental Information for:

## Monolacunary Keggin Polyoxometalates Connected to Ten 4d or 4f Metal Atoms

Haijun Pang<sup>a,b</sup>, Carlos J. Gómez-García<sup>c</sup>, Jun Peng<sup>a\*</sup>, Huiyuan Ma<sup>b</sup>, Chunjing Zhang<sup>d</sup>  
and Qingyin Wu<sup>e</sup>

### Table of contents:

1. **Fig. S1.** Coordination modes of  $\text{Ce}^{3+}$  and  $\text{Ag}^+$  cations in **1**, page S1.
2. **Fig. S2.** The detailed coordination environments of  $\text{Ag}1^+$  and  $\text{Ag}2^+$  cations, page S1.
3. **Fig. S3.** Combined polyhedral/ball and stick and space-filling diagrams of **1** showing the 2D channels along [100] (left) and [010] (right) directions, page S2.
4. **Table S1.** Summaries of calculated values from BVS for the metal centers in **1** and **2**, page S2.
5. **Fig. S4.** The UV spectra of **1**,  $\text{K}_8\text{SiW}_{11}\text{O}_{39}$ ,  $\text{AgNO}_3$  and  $\text{Ce}(\text{NO}_3)_3$  in aqueous solution.
5. **Fig. S5.** The TG curves: **1** (left) and **2** (right), page S3.
6. **Fig. S6.** The simulated (red) and experimental (black) XRPD patterns of **1** and **2**, page S3.

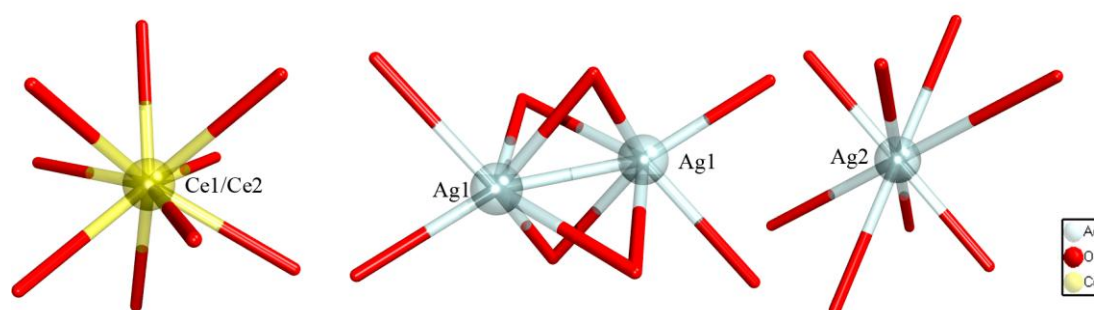

**Fig. S1.** Coordination modes of  $\text{Ce}^{3+}$  and  $\text{Ag}^+$  cations in **1**.

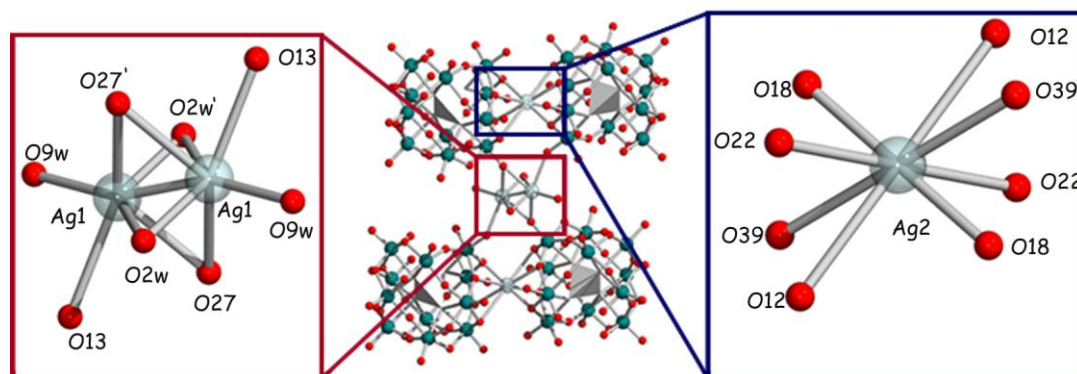

**Fig. S2.** The detailed coordination environments of  $\text{Ag}1^+$  and  $\text{Ag}2^+$  cations.

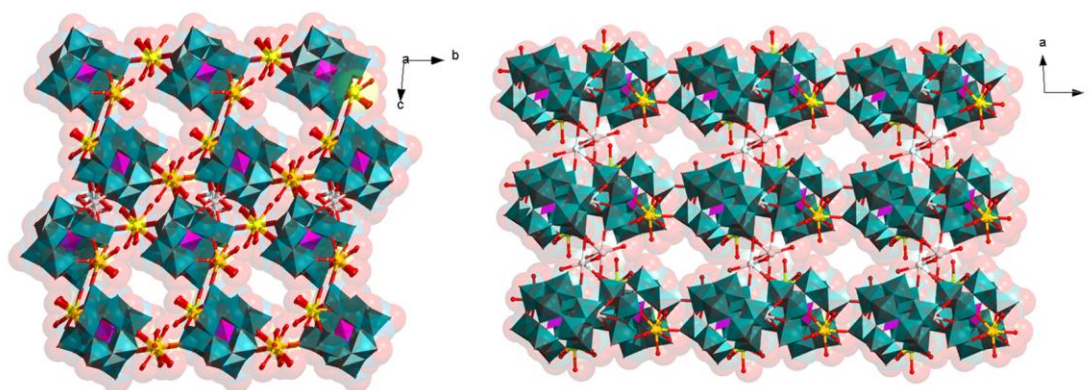

**Fig. S3.** Combined polyhedral/ball/stick and space-filling diagrams of **1** showing the 2D channels along [100] (left) and [010] (right) directions.

**Table S1.** Summary of calculated values from BVS for the metal centers in **1** and **2**

| Compound 1                 | atom  | $R_0$ | BVS  | Compound 2                 | atom | $R_0$ | BVS  |
|----------------------------|-------|-------|------|----------------------------|------|-------|------|
| (Ag-Ce-SiW <sub>11</sub> ) | Ag1   | 1.805 | 1.06 | (Ag-Pr-SiW <sub>11</sub> ) | Ag1  | 1.805 | 1.28 |
|                            | Ag2   | 1.805 | 0.95 |                            | Ag2  | 1.805 | 0.98 |
|                            | Ce1   | 2.094 | 2.67 |                            | Pr1  | 2.138 | 3.26 |
|                            | Ce2   | 2.094 | 2.75 |                            | Pr2  | 2.138 | 3.32 |
|                            | W1    | 1.921 | 6.38 |                            | W1   | 1.921 | 6.15 |
|                            | W2    | 1.921 | 6.26 |                            | W2   | 1.921 | 5.88 |
|                            | W3    | 1.921 | 6.25 |                            | W3   | 1.921 | 6.11 |
|                            | W4    | 1.921 | 6.07 |                            | W4   | 1.921 | 5.90 |
|                            | W5    | 1.921 | 6.02 |                            | W5   | 1.921 | 6.19 |
|                            | W6    | 1.921 | 6.20 |                            | W6   | 1.921 | 6.39 |
|                            | W7    | 1.921 | 5.93 |                            | W7   | 1.921 | 6.36 |
| W8                         | 1.921 | 6.24  | W8   | 1.921                      | 6.26 |       |      |
| W9                         | 1.921 | 6.22  | W9   | 1.921                      | 6.30 |       |      |
| W10                        | 1.921 | 6.09  | W10  | 1.921                      | 6.42 |       |      |
| W11                        | 1.921 | 6.45  | W11  | 1.921                      | 6.38 |       |      |

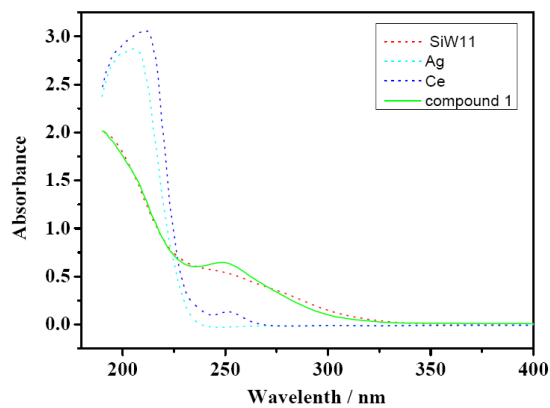

**Fig. S4.** The UV spectra of **1**, with control experiments of  $\text{K}_8\text{SiW}_{11}\text{O}_{39}\cdot 13\text{H}_2\text{O}$ ,  $\text{AgNO}_3$  and  $\text{Ce}(\text{NO}_3)_3$  aqueous solutions.

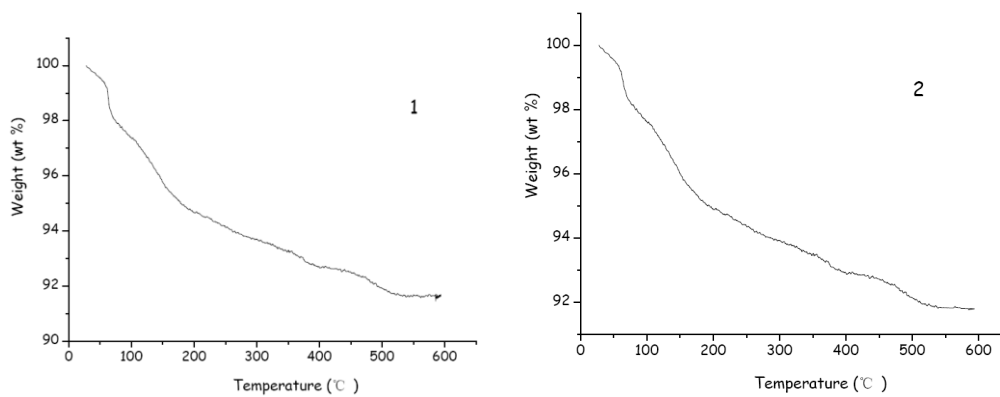

**Fig. S5.** The TG curves: **1** (left) and **2** (right).

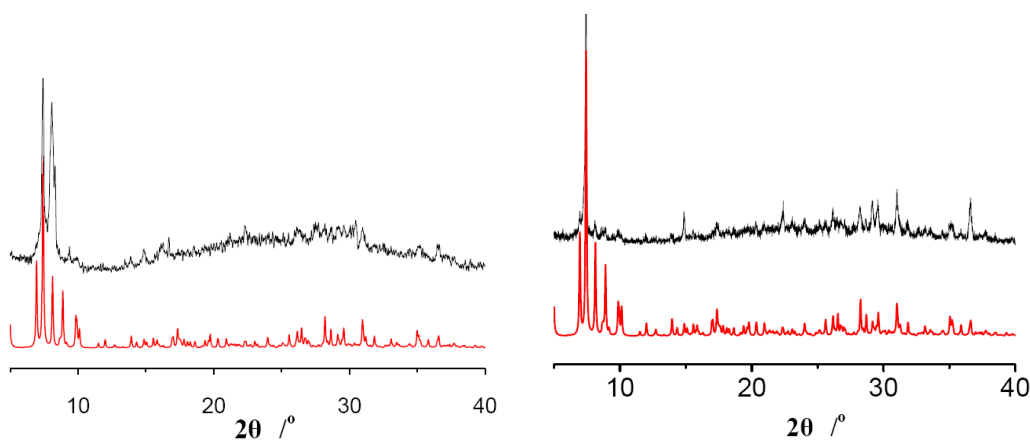

**Fig. S6.** The simulated (red) and experimental (black) XRPD patterns of **1** and **2**.
